# Supplementary material for: Role of Postharvest Oxalic Acid Treatment on Quality Properties, Phenolic Compounds, and Organic Acid Contents of Nectarine Fruits during Cold Storage
Source: MDPI journal article supplement (doi:10.3390/horticulturae9091021), 2023-09-10
Supplement: s1 [file s1]

**Table S1.** Influence of different doses of oxalic acid applications on quality properties of nectarine fruits during storage.

| Storage time                            |           | Weight lost (%) | Decay (%)    | Fruit firmness (N) | pH                 | Respiration rate (mgCO <sub>2</sub> kg <sup>-1</sup> h <sup>-1</sup> ) | SSC (%)           | TA (%)             |
|-----------------------------------------|-----------|-----------------|--------------|--------------------|--------------------|------------------------------------------------------------------------|-------------------|--------------------|
| Harvest                                 |           | 0.00 ± 0.00c    | 0.00 ± 0.00c | 43.18 ± 0.67a      | 3.60 ± 0.06c       | 40.65 ± 0.76c                                                          | 11.85 ± 0.15c     | 1.04 ± 0.08a       |
| 20                                      |           | 1.41 ± 0.19b    | 4.55 ± 0.46b | 38.18 ± 1.12b      | 3.76 ± 0.11b       | 43.70 ± 1.98b                                                          | 12.21 ± 0.23b     | 0.86 ± 0.07b       |
| 40                                      |           | 2.77 ± 0.62a    | 7.60 ± 0.81a | 33.47 ± 2.46c      | 3.86 ± 0.11a       | 50.21 ± 2.60a                                                          | 12.60 ± 0.31a     | 0.83 ± 0.07b       |
| Treatments                              |           |                 |              |                    |                    |                                                                        |                   |                    |
| Control                                 |           | 1.72 ± 1.57a    | 4.35 ± 3.64a | 36.70 ± 5.89c      | 3.83 ± 0.20a       | 47.03 ± 5.98a                                                          | 12.46 ± 0.55a     | 0.95 ± 0.10a       |
| OA 0.5 mM                               |           | 1.51 ± 1.37b    | 3.81 ± 3.20b | 37.93 ± 4.60b      | 3.73 ± 0.13ab      | 44.97 ± 4.50b                                                          | 12.23 ± 0.34ab    | 0.92 ± 0.12a       |
| OA 1 mM                                 |           | 1.28 ± 1.15c    | 3.59 ± 3.04b | 38.94 ± 3.77ab     | 3.70 ± 0.11b       | 44.22 ± 4.00bc                                                         | 12.13 ± 0.30b     | 0.88 ± 0.14a       |
| OA 1.5 mM                               |           | 1.07 ± 0.89d    | 4.46 ± 3.82a | 39.53 ± 3.26a      | 3.69 ± 0.10b       | 43.20 ± 3.26c                                                          | 12.05 ± 0.24b     | 0.89 ± 0.14a       |
| Storage time × Oxalic acid interaction  |           |                 |              |                    |                    |                                                                        |                   |                    |
| Harvest                                 |           | 0.00 ± 0.00e    | 0.00 ± 0.00d | 43.18 ± 0.88a      | b                  | 40.65 ± 1.01f                                                          | 11.85 ± 0.19c     | 1.04 ± 0.10a       |
| Day 20                                  | Control   | 1.65 ± 0.13cd   | 4.98 ± 0.32c | 36.84 ± 0.36bcd    | 3.90 ± 0.09ab      | 46.52 ± 0.91cd                                                         | 12.50 ± 0.13ab    | 0.91 ± 0.08a       |
|                                         | OA 0.5 mM | 1.48 ± 0.13d    | 4.34 ± 0.22c | 37.67 ± 0.41bc     | 3.74 ± 0.07ab      | 43.83 ± 0.43de                                                         | 12.27 ± 0.14bc    | 0.88 ± 0.09a       |
|                                         | OA 1 mM   | 1.26 ± 0.09d    | 4.02 ± 0.20c | 38.80 ± 0.23b      | 3.69 ± 0.06b       | 42.83 ± 0.54ef                                                         | 12.06 ± 0.10bc    | 0.81 ± 0.05a       |
|                                         | OA 1.5 mM | 1.26 ± 0.07d    | 4.87 ± 0.30c | 39.42 ± 0.69b      | 3.70 ± 0.04ab      | 41.62 ± 0.32ef                                                         | 11.99 ± 0.13bc    | 0.84 ± 0.03a       |
| Day 40                                  | Control   | 3.50 ± 0.18a    | 8.06 ± 0.25a | 30.07 ± 0.80f      | 4.00 ± 0.10a       | 53.91 ± 0.37a                                                          | 13.04 ± 0.16a     | 0.88 ± 0.06a       |
|                                         | OA 0.5 mM | 3.05 ± 0.19a    | 7.07 ± 0.45b | 32.95 ± 0.38e      | 3.87 ± 0.06ab      | 50.43 ± 0.55b                                                          | 12.57 ± 0.14ab    | 0.84 ± 0.03a       |
|                                         | OA 1 mM   | 2.57 ± 0.12b    | 6.74 ± 0.34b | 34.85 ± 0.92de     | 3.81 ± 0.05ab      | 49.17 ± 0.50bc                                                         | 12.47 ± 0.10ab    | 0.80 ± 0.08a       |
|                                         | OA 1.5 mM | 1.96 ± 0.18c    | 8.52 ± 0.18a | 36.00 ± 0.61cd     | 3.77 ± 0.10ab      | 47.32 ± 0.41c                                                          | 12.31 ± 0.08bc    | 0.79 ± 0.09a       |
| ANOVA                                   |           |                 |              |                    |                    |                                                                        |                   |                    |
| F <sub>Storage time</sub>               |           | 35.23***        | 18.24***     | 18.65***           | 4.31*              | 30.06***                                                               | 8.46**            | 0.75 <sup>ns</sup> |
| F <sub>Oxalic</sub>                     |           | 17.7***         | 6.2**        | 6.84**             | 1.13 <sup>ns</sup> | 7.98**                                                                 | 2.4 <sup>ns</sup> | 0.21 <sup>ns</sup> |
| F <sub>Storage time × Oxalic acid</sub> |           | 1147.59***      | 2010.11***   | 379.93***          | 23.3***            | 362.77***                                                              | 48.58***          | 16.15***           |

Different letters in the same column indicates statistical differences at  $p \leq 0.05$ . ns: not significant. \*, \*\*, \*\*\* indicates  $p \leq 0.05$ , 0--0.01, and 0.001, respectively.
